# Supplementary material
Source: publisher site journal article supplement (https://oneecosystem.pensoft.net/article/download/suppl/4307154/)
Supplement: Supplementary file 1

**Annex 1. Classification of ecosystems for national level ecosystem service valuation based on CORINE Land Cover and Consolidated Layer of Ecosystems.**

**Table S1. CORINE Land Cover classification adjusted for ecosystem service valuation at the national level.**

| <b>Ecosystem category</b>                            | <b>Corine Land Cover class</b>                           | <b>Description</b>                                                                                                                                       |
|------------------------------------------------------|----------------------------------------------------------|----------------------------------------------------------------------------------------------------------------------------------------------------------|
| <b>1. Artificial and bare (zero ecosystem value)</b> | <i>1.1.1. Continuous urban fabric</i>                    | Buildings, roads and artificially surfaced areas cover more than 80% of the total surface. Non-linear areas of vegetation and bare soil are exceptional. |
|                                                      | <i>1.2.1. Industrial or commercial units</i>             | Artificially surfaced areas (cement, asphalt, tarmacadam, or stabilised, e.g. beaten earth) without vegetation occupy most of the area.                  |
|                                                      | <i>1.2.2. Road and rail networks and associated land</i> | Motorways and railways, including associated installations.                                                                                              |
|                                                      | <i>1.2.3. Port areas</i>                                 | Infrastructure of port areas, including quays, dockyards and marinas.                                                                                    |
|                                                      | <i>1.2.4. Airports</i>                                   | Airport installations: runways, buildings and associated land.                                                                                           |
|                                                      | <i>1.3.1. Mineral extraction sites</i>                   | Areas with open-pit extraction of construction material (sandpits, quarries) or other minerals (open-cast mines).                                        |
|                                                      | <i>1.3.2. Dump sites</i>                                 | Public, industrial or mine dump sites.                                                                                                                   |
|                                                      | <i>1.3.3. Construction sites</i>                         | Spaces under construction development, soil or bedrock excavations, earthworks.                                                                          |
|                                                      | <i>3.3.2. Bare rock</i>                                  | Scree, cliffs, rocks outcrops, including active erosion, rocks and reef flats situated above the high-water mark.                                        |
|                                                      | <i>3.3.4. Burnt areas</i>                                | Areas affected by recent fires, still mainly black.                                                                                                      |
| <b>2. Urban</b>                                      | <i>1.1.2. Discontinuous urban fabric</i>                 | Buildings, roads and artificially surfaced areas are associated with vegetated areas and bare soil, which occupy discontinuous but                       |

|                                          |                                                                                                      |                                                                                                                                                                    |
|------------------------------------------|------------------------------------------------------------------------------------------------------|--------------------------------------------------------------------------------------------------------------------------------------------------------------------|
|                                          |                                                                                                      | significant surfaces.                                                                                                                                              |
|                                          | <i>1.4.1. Green urban areas</i>                                                                      | Areas with vegetation within the urban fabric, including parks, cemeteries with vegetation, and mansions and their ground.                                         |
|                                          | <i>1.4.2. Sport and leisure facilities</i>                                                           | Camping grounds, sports grounds, leisure parks, golf courses, racecourses, etc. Includes formal parks not surrounded by urban areas.                               |
| <b>3. Cropland</b>                       | <i>2.1.1. Non-irrigated arable land</i>                                                              | Cereals, legumes, fodder crops, root crops and fallow land.                                                                                                        |
|                                          | <i>2.1.2. Permanently irrigated land</i>                                                             | Crops irrigated permanently or periodically, using a permanent infrastructure (irrigation channels, drainage network).                                             |
|                                          | <i>2.4.2. Complex cultivation patterns</i>                                                           | Juxtaposition of small parcels of diverse annual crops, pasture and/or permanent crops.                                                                            |
|                                          | <i>2.4.3. Land principally occupied by agriculture, with significant areas of natural vegetation</i> | Areas principally occupied by agriculture, interspersed with significant natural areas.                                                                            |
| <b>4. Permanent crops</b>                | <i>2.2.1. Vineyards</i>                                                                              | Areas planted with vines.                                                                                                                                          |
|                                          | <i>2.2.2. Fruit trees and berry plantations</i>                                                      | Parcels planted with fruit trees or shrubs.                                                                                                                        |
| <b>5. Pastures and natural grassland</b> | <i>2.3.1. Pastures</i>                                                                               | Dense grass cover, of floral composition, dominated by graminaceae, not under a rotation system. Mainly for grazing, but the folder may be harvested mechanically. |
|                                          | <i>3.2.1. Natural grassland</i>                                                                      | Low productivity grassland. Often situated in areas of rough, uneven ground. Frequently includes rocky areas, briars and heathland.                                |
|                                          | <i>3.2.2. Moors and heathland</i>                                                                    | Vegetation with low and closed cover, dominated by bushes, shrubs and herbaceous plants (heather, briars, broom, gorse, laburnum, etc.).                           |
| <b>6. Forest</b>                         | <i>3.1.1. Broad-leaved forest</i>                                                                    | Vegetation formation composed principally of trees, including shrub and bush understoreys, where broad-leaved species predominate.                                 |
|                                          | <i>3.1.2. Coniferous forest</i>                                                                      | Vegetation formation                                                                                                                                               |

|                   |                                           |                                                                                                                                                           |
|-------------------|-------------------------------------------|-----------------------------------------------------------------------------------------------------------------------------------------------------------|
|                   |                                           | composed principally of trees, including shrub and bush understoreys, where coniferous species predominate.                                               |
|                   | <i>3.1.3. Mixed forest</i>                | Vegetation formation composed principally of trees, including shrub and bush understoreys, where neither broad-leaved nor coniferous species predominate. |
|                   | <i>3.2.4. Transitional woodland/shrub</i> | Bushy or herbaceous vegetation with scattered trees. Can represent either woodland degradation or forest regeneration/colonisation.                       |
| <b>7. Wetland</b> | <i>4.1.1. Inland marshes</i>              | Low-lying land usually flooded in winter and more or less saturated by water all year round.                                                              |
|                   | <i>4.1.2. Peatbogs</i>                    | Peatland consisting mainly of decomposed moss and vegetable matter.                                                                                       |
| <b>8. Water</b>   | <i>5.1.1. Water courses</i>               | Natural or artificial water courses serving as water drainage channels. Includes canals.                                                                  |
|                   | <i>5.1.2. Water bodies</i>                | Natural or artificial stretches of water.                                                                                                                 |

**Table S2. Classification of Consolidated Layer of Ecosystems of the Czech Republic.**

| <b>Ecosystem</b>               | <b>Class</b>             | <b>Category</b>                                           |
|--------------------------------|--------------------------|-----------------------------------------------------------|
| <b>1. Urban systems</b>        | <i>Urban areas</i>       | Continuous urban fabric                                   |
|                                | <i>Urban areas</i>       | Discontinuous urban fabric                                |
|                                | <i>Urban areas</i>       | Industrial and commercial units                           |
|                                | <i>Urban areas</i>       | Transport units                                           |
|                                | <i>Urban areas</i>       | Dump and construction units                               |
|                                | <i>Urban areas</i>       | Urban nature                                              |
|                                | <i>Urban areas</i>       | Artificial urban green areas – parks, gardens, cemeteries |
|                                | <i>Urban areas</i>       | Artificial urban green areas – recreation and sport areas |
| <b>2. Agricultural systems</b> | <i>Agricultural land</i> | Arable land                                               |
|                                | <i>Agricultural land</i> | Orchards and gardens                                      |
|                                | <i>Agricultural land</i> | Hop fields                                                |

|                                |                           |                                            |
|--------------------------------|---------------------------|--------------------------------------------|
|                                | <i>Agricultural land</i>  | Vineyards                                  |
|                                | <i>Agricultural land</i>  | Intensive grasslands                       |
| <b>3. Grassland ecosystems</b> | <i>Grasslands</i>         | Alluvial meadows                           |
|                                | <i>Grasslands</i>         | Dry grasslands                             |
|                                | <i>Grasslands</i>         | Mesic meadows                              |
|                                | <i>Grasslands</i>         | Alpine grasslands                          |
|                                | <i>Grasslands</i>         | Heaths                                     |
| <b>4. Forest ecosystems</b>    | <i>Forests</i>            | Intensive coniferous forests               |
|                                | <i>Forests</i>            | Intensive broad-leaved forests             |
|                                | <i>Forests</i>            | Intensive mixed forests                    |
|                                | <i>Forests</i>            | Alluvial forests                           |
|                                | <i>Forests</i>            | Oak and oak-hornbeam forests               |
|                                | <i>Forests</i>            | Ravine forests                             |
|                                | <i>Forests</i>            | Beech forests                              |
|                                | <i>Forests</i>            | Dry pine forests                           |
|                                | <i>Forests</i>            | Spruce forests                             |
|                                | <i>Forests</i>            | Bog forests                                |
|                                | <i>Forests</i>            | Natural Pinus mugo shrub                   |
|                                | <i>Forests</i>            | Natural shrub vegetation                   |
|                                | <i>Forests</i>            | Introduced Pinus mugo scrub                |
|                                | <i>Forests</i>            | Introduced shrub vegetation                |
| <b>5. Wetland ecosystems</b>   | <i>Wetlands</i>           | Wetlands and littoral vegetation           |
|                                | <i>Wetlands</i>           | Peatbogs and springs                       |
|                                | <i>Wetlands</i>           | Swamps                                     |
| <b>6. Aquatic ecosystems</b>   | <i>Aquatic ecosystems</i> | Macrophyte vegetation of water bodies      |
|                                | <i>Aquatic ecosystems</i> | Human influenced water bodies              |
|                                | <i>Aquatic ecosystems</i> | Natural water courses                      |
|                                | <i>Aquatic ecosystems</i> | Anthropogenically influenced water courses |
| <b>7. Bare land</b>            | <i>Bare rock</i>          | Artificial rocks                           |
|                                | <i>Bare rock</i>          | Natural rocks                              |
